# Supplementary material for: Pharmacogenomic and drug interaction risk associations with hospital length of stay among Medicare Advantage members with COVID-19
Source: bioRxiv or medRxiv preprint supplement (doi:10.1101/2021.05.06.21256769), 2021-05-13
Supplement: Supplementary file [file media-1.pdf]

## Supplemental Tables

**eTable 1:** Frequently prescribed drugs with moderate or high PIP among Medicare Advantage members hospitalized with COVID-19

**eTable 2:** Distribution of length of stay among Medicare Advantage members hospitalized with COVID-19 by pharmacogenomic risk and drug-drug interaction

**eTable 3:** Length-of-stay ratios of covariates in the baseline model

**eTable 4:** Distribution of patients by HCC count subpopulation, PIP, and DDI category

**eTable 5:** Distribution of length of stay among Medicare Advantage members hospitalized with COVID-19 by HCC count and pharmacogenomic or drug-drug interaction risk

### **eTables 6–10: Summary Tables for HCC Count Subpopulation Models**

**eTable 6:** Length-of-stay ratios in the model for all Medicare Advantage members hospitalized with COVID-19

**eTable 7:** Expected LOS ratios in the model for patients with zero or one HCC

**eTable 8:** Expected LOS ratios in the model for patients with two or three HCC

**eTable 9:** Expected LOS ratios in the model for patients with four or five HCC

**eTable 10:** Expected LOS ratios in the model for patients with six or more HCC

**eTable 11:** Distribution of patients by chronic condition subpopulation, pharmacogenomic risk, and drug-drug interaction risk

### **eTables 12–15: Summary Tables for Chronic Conditions Subpopulation Models**

**eTable 12:** Expected LOS ratios in the model for patients with COPD

**eTable 13:** Expected LOS ratios in the model for patients with diabetes

**eTable 14:** Expected LOS ratios in the model for patients with hyperlipidemia

**eTable 15:** Expected LOS ratios in the model for patients with hypertension

**eTable 1. Frequently prescribed drugs with moderate or high PIP among Medicare Advantage members hospitalized with COVID-19**

| <b>Generic Name</b> | <b>Drug Class</b>                       | <b>Minimum patient PIP associated with drug</b> | <b>Frequency, No. (%)</b> |
|---------------------|-----------------------------------------|-------------------------------------------------|---------------------------|
| Metoprolol          | Beta blockers                           | 46%                                             | 1,422 (24%)               |
| Pantoprazole        | Proton-pump inhibitors                  | 29%                                             | 730 (12%)                 |
| Omeprazole          | Proton-pump inhibitors                  | 30%                                             | 571 (9%)                  |
| Escitalopram        | Selective serotonin-reuptake Inhibitors | 33%                                             | 365 (6%)                  |
| Citalopram          | Selective serotonin-reuptake Inhibitors | 32%                                             | 207 (3%)                  |

PIP, pharmacogenetic interaction probability

**eTable 2. Distribution of length of stay among Medicare Advantage members hospitalized with COVID-19 by pharmacogenomic risk and drug-drug interaction**

| Medication risk measure | Pharmacogenomic risk category       | LOS (days), Mean (95% CI) | LOS (days) Median |
|-------------------------|-------------------------------------|---------------------------|-------------------|
| PIP                     | Low ( $\leq 25\%$ )                 | 12.0 (11.6–12.4)          | 8                 |
|                         | Moderate (26%–50%)                  | 13.2 (12.7–13.7)          | 9                 |
|                         | High ( $>50\%$ )                    | 13.8 (13–14.6)            | 9                 |
| DDI                     | Minimal or minor                    | 12.4 (12–12.8)            | 8                 |
|                         | Moderate, major, or contraindicated | 12.7 (12.3–13.1)          | 8                 |

The average LOS (in days) for each unique DDI severity category were minimal: 12.0 for minimal DDI, 12.5 for minor DDI, 13.1 for moderate DDI, 12.6 for major DDI, and 12.6 for contraindicated DDI.

LOS: length of stay; PIP: pharmacogenetic interaction probability; DDI: drug-drug interaction

**eTable 3. Length-of-stay ratios of covariates in the baseline model**

| <b>Variable</b>                                      | <b>Rate Ratio (95% CI)</b> | <b>P-value</b> |
|------------------------------------------------------|----------------------------|----------------|
| Moderate PIP (26% – 50%) <sup>a</sup>                | 1.09 (1.04, 1.15)          | <0.001         |
| High PIP (> 50%) <sup>a</sup>                        | 1.16 (1.08, 1.24)          | <0.001         |
| Moderate, major, or contraindicated DDI <sup>b</sup> | 1.02 (0.98, 1.06)          | 0.384          |
| Age                                                  | 1.005 (1.003, 1.007)       | <0.001         |
| Gender <sup>c</sup>                                  | 1.08 (1.03, 1.13)          | 0.001          |

<sup>a</sup>Low PPI (0-25%) as baseline; <sup>b</sup>Minimal or minor DDI as baseline; <sup>c</sup>female as baseline.  
PIP: pharmacogenetic interaction probability; DDI: drug-drug interaction

**eTable 4. Distribution of patients by HCC count subpopulation, pharmacogenomic risk, and drug-drug interaction categories**

| HCC Count | Patients, No. (%) | No. of patients by PIP |                    |                   | No. of patients by DDI |                                     |
|-----------|-------------------|------------------------|--------------------|-------------------|------------------------|-------------------------------------|
|           |                   | Low ( $\leq 25\%$ )    | Moderate (26%–50%) | High ( $> 50\%$ ) | Minimal or minor       | Moderate, major, or contraindicated |
| 0 or 1    | 1,460 (24.2)      | 989                    | 377                | 94                | 954                    | 506                                 |
| 2 or 3    | 1,991 (33.1)      | 1,245                  | 542                | 204               | 1,083                  | 908                                 |
| 4 or 5    | 1,182 (19.6)      | 597                    | 388                | 197               | 519                    | 663                                 |
| 6 or more | 1,392 (23.1)      | 683                    | 477                | 232               | 554                    | 838                                 |

HCC: hierarchical conditions categories; PIP: pharmacogenomic interaction probability; DDI: drug-drug interaction.

**eTable 5. Distribution of length of stay among Medicare Advantage members hospitalized with COVID-19 by HCC count and pharmacogenomic or drug-drug interaction risk**

| HCC Count | Mean LOS | LOS by PIP, mean (95% CI) |                  |                  | LOS by DDI, mean (95% CI) |                                     |
|-----------|----------|---------------------------|------------------|------------------|---------------------------|-------------------------------------|
|           |          | ≤ 25%                     | 26–50%           | >50%             | Minimal or minor          | Moderate, major, or contraindicated |
| Any       | 12.6     | 12.0 (11.6–12.4)          | 13.2 (12.7–13.7) | 13.8 (13–14.6)   | 12.4 (12–12.8)            | 12.8 (12.3–13.1)                    |
| 0 or 1    | 11.8     | 11.2 (10.6–11.8)          | 12.9 (11.7–14.1) | 14.0 (11.5–16.5) | 12.1 (11.4–12.8)          | 11.2 (10.3–12.1)                    |
| 2 or 3    | 11.8     | 11.6 (11–12.2)            | 12.0 (11.2–12.8) | 12.3 (10.9–13.7) | 11.4 (10.8–12)            | 12.2 (11.5–12.9)                    |
| 4 or 5    | 13.1     | 12.6 (11.7–13.5)          | 13.9 (12.7–14.9) | 13.4 (11.9–14.9) | 12.9 (11.9–13.9)          | 13.3 (12.5–14.1)                    |
| 6 or more | 14.1     | 13.5 (12.5–14.3)          | 14.3 (13.2–15.4) | 15.3 (13.6–17)   | 14.4 (13.4–15.4)          | 13.8 (13–14.6)                      |

HCC: hierarchical conditions categories; PIP: pharmacogenomic interaction probability; DDI: drug-drug interaction

**eTable 6. Length-of-stay ratios in the model for all Medicare Advantage members hospitalized with COVID-19**

| Variable                    | Description                                                               | Ratio | 95% C.I.       | P-value |
|-----------------------------|---------------------------------------------------------------------------|-------|----------------|---------|
| (Intercept)                 | Intercept                                                                 | 7.12  | (5.41, 9.37)   | < 0.001 |
| Moderate PIP <sup>a</sup>   | 26 to 50%                                                                 | 1.09  | (1.04, 1.14)   | < 0.001 |
| High PIP <sup>a</sup>       | > 50%                                                                     | 1.16  | (1.09, 1.24)   | < 0.001 |
| DDI Category 1 <sup>b</sup> | Moderate, major, or contraindicated                                       | 1.04  | (1.00, 1.09)   | 0.066   |
| Age                         | Age of a patient (2019)                                                   | 1.007 | (1.004, 1.009) | < 0.001 |
| Income                      | Median household income per ZCTA level (standardized)                     | 1.06  | (1.04, 1.09)   | < 0.001 |
| RAF Score                   | Risk adjustment factor score                                              | 1.02  | (1.00, 1.04)   | 0.108   |
| D-SNP                       | Enrolled for at least one month in the dual - eligible special needs plan | 0.93  | (0.85, 1.02)   | 0.136   |
| I-SNP                       | Enrolled for at least one month in the institutional special needs plan   | 0.73  | (0.70, 0.77)   | < 0.001 |
| Gender <sup>c</sup>         | Gender of a patient                                                       | 1.05  | (1.00, 1.10)   | 0.027   |
| Race Code 1 <sup>d</sup>    | White (non-Hispanic)                                                      | 0.97  | (0.77, 1.21)   | 0.769   |
| Race Code 2 <sup>d</sup>    | Black (non-Hispanic)                                                      | 0.97  | (0.77, 1.22)   | 0.806   |
| Race Code 3 <sup>d</sup>    | Other                                                                     | 1.03  | (0.79, 1.33)   | 0.845   |
| Race Code 4 <sup>d</sup>    | Asian/Pacific Islander                                                    | 0.89  | (0.68, 1.18)   | 0.426   |
| Race Code 5 <sup>d</sup>    | Hispanic/Latino                                                           | 0.90  | (0.70, 1.16)   | 0.430   |
| HCC009                      | Lung and other severe cancers                                             | 0.76  | (0.64, 0.90)   | 0.002   |
| HCC017                      | Diabetes with acute complications                                         | 0.88  | (0.74, 1.05)   | 0.160   |

|        |                                                                             |      |              |         |
|--------|-----------------------------------------------------------------------------|------|--------------|---------|
| HCC023 | Other significant endocrine and metabolic disorders                         | 0.92 | (0.84, 1.01) | 0.079   |
| HCC027 | End-stage liver disease                                                     | 1.38 | (1.04, 1.82) | 0.026   |
| HCC033 | Intestinal obstruction/perforation                                          | 1.05 | (0.93, 1.19) | 0.443   |
| HCC039 | Bone/joint/muscle infections/necrosis                                       | 1.14 | (1.00, 1.30) | 0.051   |
| HCC046 | Severe hematological disorders                                              | 0.73 | (0.57, 0.94) | 0.013   |
| HCC047 | Disorders of immunity                                                       | 0.92 | (0.79, 1.07) | 0.269   |
| HCC048 | Coagulation defects and other specified hematological disorders             | 1.06 | (0.97, 1.15) | 0.192   |
| HCC054 | Substance use with psychotic complications                                  | 1.27 | (0.92, 1.74) | 0.147   |
| HCC055 | Substance use disorder, moderate/severe or substance use with complications | 1.08 | (0.95, 1.23) | 0.234   |
| HCC057 | Schizophrenia                                                               | 1.13 | (1.02, 1.25) | 0.018   |
| HCC072 | Spinal cord disorders/injuries                                              | 1.18 | (0.97, 1.44) | 0.106   |
| HCC073 | Amyotrophic lateral sclerosis and other motor neuron disease                | 1.28 | (0.71, 2.30) | 0.416   |
| HCC077 | Multiple sclerosis                                                          | 1.41 | (1.20, 1.66) | < 0.001 |
| HCC082 | Respirator dependence/ tracheostomy status                                  | 1.22 | (0.96, 1.56) | 0.101   |
| HCC084 | Cardio-respiratory failure and shock                                        | 1.07 | (0.98, 1.16) | 0.124   |
| HCC099 | Cerebral hemorrhage                                                         | 1.09 | (0.91, 1.31) | 0.324   |
| HCC103 | Hemiplegia/hemiparesis                                                      | 1.06 | (0.97, 1.15) | 0.195   |
| HCC104 | Monoplegia, other paralytic syndromes                                       | 0.63 | (0.43, 0.94) | 0.022   |
| HCC107 | Vascular disease with complications                                         | 1.10 | (0.99, 1.23) | 0.088   |



|        |                                                   |      |              |       |
|--------|---------------------------------------------------|------|--------------|-------|
| HCC112 | Fibrosis of lung and other chronic lung disorders | 0.69 | (0.54, 0.89) | 0.004 |
| HCC114 | Aspiration and specified bacterial pneumonias     | 1.02 | (0.90, 1.15) | 0.758 |
| HCC115 | Pneumococcal pneumonia, empyema, lung abscess     | 0.91 | (0.80, 1.05) | 0.191 |
| HCC134 | Dialysis status                                   | 0.91 | (0.80, 1.05) | 0.194 |
| HCC135 | Acute renal failure                               | 1.01 | (0.95, 1.09) | 0.684 |
| HCC137 | Chronic kidney disease, severe (stage 4)          | 0.83 | (0.69, 1.00) | 0.046 |
| HCC161 | Chronic ulcer of skin, except pressure            | 1.07 | (0.98, 1.17) | 0.144 |
| HCC169 | Vertebral fractures without spinal cord injury    | 1.13 | (0.96, 1.32) | 0.149 |
| HCC170 | Hip fracture/dislocation                          | 1.23 | (1.09, 1.38) | 0.001 |
| HCC173 | Traumatic amputations and complications           | 1.16 | (0.94, 1.43) | 0.171 |

<sup>a</sup>0-25% PPI as baseline; <sup>b</sup>minimal or minor DDI as baseline; <sup>c</sup>female as baseline; <sup>d</sup>unknown race as baseline  
Significance was set at  $P < 0.05$ . HCC: hierarchical conditions categories. PIP: pharmacogenomic interaction probability; DDI: drug-drug interaction; D-SNP: dual special needs plan; I-SNP: institutional special needs plan.

**eTable 7. Expected length-of-stay ratios in the model for patients with zero or one HCC**

| Variable                    | Description                                                                              | Ratio | 95% C.I.       | P-value |
|-----------------------------|------------------------------------------------------------------------------------------|-------|----------------|---------|
| (Intercept)                 | Intercept                                                                                | 4.93  | (2.91, 8.34)   | <0.001  |
| Moderate PIP <sup>a</sup>   | 26 to 50%                                                                                | 1.15  | (1.04, 1.28)   | 0.007   |
| High PIP <sup>a</sup>       | >50%                                                                                     | 1.39  | (1.15, 1.67)   | <0.001  |
| DDI Category 1 <sup>b</sup> | Moderate, major, or contraindicated                                                      | 0.91  | (0.82, 1.00)   | 0.045   |
| Age                         | Age of a patient (2019)                                                                  | 1.015 | (1.010, 1.020) | <0.001  |
| Income                      | Median household income per ZCTA level (standardized)                                    | 1.03  | (0.99, 1.08)   | 0.188   |
| C-SNP                       | Enrolled for at least one month in the chronic or disabling condition special needs plan | 0.89  | (0.68, 1.15)   | 0.372   |
| D-SNP                       | Enrolled for at least one month in the dual - eligible special needs plan                | 0.74  | (0.58, 0.94)   | 0.012   |
| I-SNP                       | Enrolled for at least one month in the institutional special needs plan                  | 0.75  | (0.67, 0.84)   | <0.001  |
| Gender <sup>c</sup>         | Gender of a patient                                                                      | 1.08  | (0.98, 1.19)   | 0.107   |
| Race Code 1 <sup>d</sup>    | White (non-Hispanic)                                                                     | 0.73  | (0.50, 1.06)   | 0.101   |
| Race Code 2 <sup>d</sup>    | Black (non-Hispanic)                                                                     | 0.69  | (0.47, 1.01)   | 0.059   |
| Race Code 3 <sup>d</sup>    | Other                                                                                    | 0.57  | (0.36, 0.88)   | 0.012   |
| Race Code 4 <sup>d</sup>    | Asian/Pacific Islander                                                                   | 0.73  | (0.47, 1.14)   | 0.166   |
| Race Code 5 <sup>d</sup>    | Hispanic/Latino                                                                          | 0.61  | (0.40, 0.93)   | 0.022   |
| HCC010                      | Lymphoma and other cancers                                                               | 1.36  | (0.72, 2.56)   | 0.338   |
| HCC012                      | Breast, prostate, and other cancers and tumors                                           | 0.86  | (0.63, 1.17)   | 0.333   |

|        |                                                                 |      |              |       |
|--------|-----------------------------------------------------------------|------|--------------|-------|
| HCC022 | Morbid obesity                                                  | 0.87 | (0.59, 1.30) | 0.506 |
| HCC040 | Rheumatoid arthritis and inflammatory connective tissue disease | 1.52 | (1.10, 2.10) | 0.012 |
| HCC057 | Schizophrenia                                                   | 1.50 | (0.97, 2.33) | 0.071 |
| HCC058 | Reactive and unspecified psychosis                              | 1.40 | (1.08, 1.82) | 0.011 |
| HCC077 | Multiple sclerosis                                              | 1.45 | (0.79, 2.63) | 0.227 |
| HCC079 | Seizure disorders and convulsions                               | 0.64 | (0.41, 1.00) | 0.052 |
| HCC085 | Congestive heart failure                                        | 0.88 | (0.65, 1.20) | 0.422 |
| HCC115 | Pneumococcal pneumonia, empyema, lung abscess                   | 2.62 | (1.33, 5.17) | 0.005 |
| HCC124 | Exudative macular degeneration                                  | 1.15 | (0.67, 1.95) | 0.616 |

<sup>a</sup>0-25% PIP as baseline; <sup>b</sup>minimal or minor DDI as baseline; <sup>c</sup>female as baseline; <sup>d</sup>unknown race as baseline  
Significance was set at  $P < 0.05$ . HCC: hierarchical conditions categories. PIP: pharmacogenomic interaction probability; DDI: drug-drug interaction; C-SNP: chronic condition special needs plan; D-SNP: dual special needs plan; I-SNP: institutional special needs plan.

**eTable 8. Expected length-of-stay ratios in the model for patients with two or three HCC**

| Variable                    | Description                                                             | Ratio | 95% C.I.       | P-value |
|-----------------------------|-------------------------------------------------------------------------|-------|----------------|---------|
| (Intercept)                 | Intercept                                                               | 6.25  | (3.91, 10.01)  | <0.001  |
| Moderate PIP <sup>a</sup>   | 26% to 50%                                                              | 1.03  | (0.95, 1.11)   | 0.522   |
| High PIP <sup>a</sup>       | >50%                                                                    | 1.08  | (0.96, 1.21)   | 0.204   |
| DDI Category 1 <sup>b</sup> | Moderate, major, or contraindicated                                     | 1.10  | (1.02, 1.18)   | 0.010   |
| Age                         | Age of a patient (2019)                                                 | 1.004 | (1.000, 1.007) | 0.028   |
| Income                      | Median household income per ZCTA level (standardized)                   | 1.07  | (1.03, 1.11)   | <0.001  |
| I-SNP                       | Enrolled for at least one month in the institutional special needs plan | 0.77  | (0.72, 0.83)   | <0.001  |
| Race Code 1 <sup>c</sup>    | White (non-Hispanic)                                                    | 1.42  | (0.94, 2.14)   | 0.098   |
| Race Code 2 <sup>c</sup>    | Black (non-Hispanic)                                                    | 1.46  | (0.97, 2.21)   | 0.073   |
| Race Code 3 <sup>c</sup>    | Other                                                                   | 1.74  | (1.10, 2.76)   | 0.018   |
| Race Code 4 <sup>c</sup>    | Asian/Pacific Islander                                                  | 1.10  | (0.66, 1.83)   | 0.720   |
| Race Code 5 <sup>c</sup>    | Hispanic/Latino                                                         | 1.54  | (0.98, 2.44)   | 0.061   |
| HCC018                      | Diabetes with chronic complications                                     | 0.92  | (0.86, 1.00)   | 0.043   |
| HCC023                      | Other significant endocrine and metabolic disorders                     | 0.81  | (0.66, 1.00)   | 0.045   |
| HCC054                      | Substance use with psychotic complications                              | 1.66  | (0.91, 3.03)   | 0.099   |
| HCC058                      | Reactive and unspecified psychosis                                      | 1.09  | (0.99, 1.21)   | 0.084   |
| HCC072                      | Spinal cord disorders/injuries                                          | 1.67  | (1.10, 2.52)   | 0.015   |
| HCC084                      | Cardio-respiratory failure and shock                                    | 1.40  | (1.03, 1.90)   | 0.033   |

|        |                                                          |      |              |       |
|--------|----------------------------------------------------------|------|--------------|-------|
| HCC106 | Atherosclerosis of extremity with ulceration or gangrene | 1.51 | (1.05, 2.17) | 0.025 |
| HCC112 | Fibrosis of lung and other chronic lung disorders        | 0.46 | (0.27, 0.78) | 0.004 |
| HCC169 | Vertebral fractures without spinal cord injury           | 1.25 | (0.90, 1.72) | 0.177 |
| HCC170 | Hip fracture/dislocation                                 | 1.45 | (1.13, 1.85) | 0.003 |

<sup>a</sup>0-25% PIP as baseline; <sup>b</sup>minimal or minor DDI as baseline; <sup>c</sup>unknown race as baseline. Significance was set at  $P < 0.05$ .  
HCC: hierarchical condition categories; PIP: pharmacogenomic interaction probability; DDI: drug-drug interaction; I-SNP: institutional special needs plan.

**eTable 9. Expected length-of-stay ratios in the model for patients with four or five HCC**

| Variable                    | Description                                                             | Ratio | 95% C.I.       | P-value |
|-----------------------------|-------------------------------------------------------------------------|-------|----------------|---------|
| (Intercept)                 | Intercept                                                               | 12.97 | (11.92, 14.11) | <0.001  |
| Moderate PIP <sup>a</sup>   | 26 to 50%                                                               | 1.13  | (1.02, 1.25)   | 0.019   |
| High PIP <sup>a</sup>       | >50%                                                                    | 1.13  | (1.00, 1.29)   | 0.057   |
| DDI Category 1 <sup>b</sup> | Moderate, major, or contraindicated                                     | 1.07  | (0.97, 1.17)   | 0.179   |
| Income                      | Median household income per ZCTA level (standardized)                   | 1.05  | (1.01, 1.10)   | 0.021   |
| I-SNP                       | Enrolled for at least one month in the institutional special needs plan | 0.72  | (0.65, 0.79)   | <0.001  |
| HCC09                       | Lung and other severe cancers                                           | 0.59  | (0.42, 0.83)   | 0.002   |
| HCC039                      | Bone/joint/muscle infections/necrosis                                   | 1.65  | (1.22, 2.22)   | 0.001   |
| HCC072                      | Spinal cord disorders/injuries                                          | 1.44  | (0.92, 2.28)   | 0.114   |
| HCC077                      | Multiple sclerosis                                                      | 1.45  | (1.09, 1.92)   | 0.010   |
| HCC173                      | Traumatic amputations and complications                                 | 1.35  | (0.85, 2.13)   | 0.199   |

<sup>a</sup>0-25% PIP as baseline; <sup>b</sup>minimal or minor DDI as baseline. Significance was set at  $P < 0.05$ .

HCC: hierarchical conditions categories; PIP: pharmacogenomic interaction probability; DDI: drug-drug interaction; I-SNP: institutional special needs plan.

**eTable 10. Expected length-of-stay ratios in the model for patients with six or more chronic conditions**

| Variable                    | Description                                                                 | Ratio | 95% C.I.       | P-value |
|-----------------------------|-----------------------------------------------------------------------------|-------|----------------|---------|
| (Intercept)                 | Intercept                                                                   | 12.37 | (10.54, 14.51) | <0.001  |
| Moderate PIP <sup>a</sup>   | 26% to 50%                                                                  | 1.08  | (0.98, 1.18)   | 0.112   |
| High PIP <sup>a</sup>       | >50%                                                                        | 1.16  | (1.03, 1.31)   | 0.014   |
| DDI Category 1 <sup>b</sup> | Moderate, major, or contraindicated                                         | 1.01  | (0.93, 1.11)   | 0.786   |
| Income                      | Median household income per ZCTA level (standardized)                       | 1.08  | (1.03, 1.12)   | <0.001  |
| RAF Score                   | Risk adjustment factor score                                                | 1.02  | (0.99, 1.05)   | 0.239   |
| I-SNP                       | Enrolled for at least one month in the institutional special needs plan     | 0.66  | (0.59, 0.73)   | <0.001  |
| Gender <sup>c</sup>         | Gender of a patient                                                         | 1.11  | (1.01, 1.20)   | 0.022   |
| HCC008                      | Metastatic cancer and acute leukemia                                        | 1.26  | (0.99, 1.58)   | 0.056   |
| HCC009                      | Lung and other severe cancers                                               | 0.83  | (0.65, 1.06)   | 0.134   |
| HCC012                      | Breast, prostate, and other cancers and tumors                              | 1.20  | (1.02, 1.41)   | 0.025   |
| HCC023                      | Other significant endocrine and metabolic disorders                         | 0.91  | (0.81, 1.03)   | 0.135   |
| HCC027                      | End-stage liver disease                                                     | 1.34  | (0.98, 1.84)   | 0.069   |
| HCC028                      | Cirrhosis of liver                                                          | 0.75  | (0.56, 1.02)   | 0.064   |
| HCC046                      | Severe hematological disorders                                              | 0.54  | (0.38, 0.76)   | <0.001  |
| HCC054                      | Substance use with psychotic complications                                  | 1.35  | (0.88, 2.07)   | 0.173   |
| HCC055                      | Substance use disorder, moderate/severe or substance use with complications | 1.11  | (0.95, 1.30)   | 0.194   |

|        |                                                      |      |              |       |
|--------|------------------------------------------------------|------|--------------|-------|
| HCC077 | Multiple sclerosis                                   | 1.37 | (1.06, 1.78) | 0.018 |
| HCC099 | Cerebral hemorrhage                                  | 1.30 | (1.05, 1.60) | 0.015 |
| HCC108 | Vascular disease                                     | 0.89 | (0.82, 0.97) | 0.009 |
| HCC112 | Fibrosis of lung and other chronic lung disorders    | 0.66 | (0.46, 0.95) | 0.025 |
| HCC114 | Aspiration and specified bacterial pneumonias        | 1.05 | (0.92, 1.19) | 0.479 |
| HCC124 | Exudative macular degeneration                       | 1.23 | (0.98, 1.55) | 0.073 |
| HCC134 | Dialysis status                                      | 0.86 | (0.74, 1.01) | 0.075 |
| HCC135 | Acute renal failure                                  | 1.06 | (0.96, 1.16) | 0.252 |
| HCC158 | Pressure ulcer of skin with full thickness skin loss | 1.15 | (0.99, 1.34) | 0.069 |
| HCC170 | Hip fracture/dislocation                             | 1.12 | (0.95, 1.33) | 0.167 |

<sup>a</sup>0-25% PIP as baseline; <sup>b</sup>minimal or minor DDI as baseline; <sup>c</sup>female as baseline

Significance was set at  $P < 0.05$ . PIP: pharmacogenomic interaction probability; DDI: drug-drug interaction; RAF: risk adjustment factor; I-SNP: institutional special needs plan.



**eTable 11. Distribution of patients by chronic condition subpopulation, pharmacogenomic risk, and drug-drug interaction risk**

| Condition Group | Patient Count (%) | No. of patients by PIP |            |       | No. of patients by DDI |                                     |
|-----------------|-------------------|------------------------|------------|-------|------------------------|-------------------------------------|
|                 |                   | ≤ 25%                  | 26% to 50% | > 50% | Minimal or minor       | Moderate, major, or contraindicated |
| Hypertension    | 1,902 (31.6)      | 984                    | 620        | 298   | 887                    | 1,015                               |
| Hyperlipidemia  | 3,499 (58.1)      | 1964                   | 1078       | 457   | 1779                   | 1,720                               |
| Diabetes        | 3,104 (51.5)      | 1675                   | 983        | 446   | 1525                   | 1,579                               |
| COPD            | 1,450 (24.1)      | 804                    | 440        | 206   | 598                    | 852                                 |

**eTable 12. Expected length-of-stay ratios in the model for patients with chronic obstructive pulmonary disease**

| Variable                    | Description                                                             | Ratio | 95% C.I.       | P-value |
|-----------------------------|-------------------------------------------------------------------------|-------|----------------|---------|
| (Intercept)                 | Intercept                                                               | 5.31  | (2.76, 10.24)  | <0.001  |
| Moderate PIP <sup>a</sup>   | 26% to 50%                                                              | 1.13  | (1.03, 1.24)   | 0.009   |
| High PIP <sup>a</sup>       | >50%                                                                    | 1.18  | (1.05, 1.34)   | 0.006   |
| DDI Category 1 <sup>b</sup> | Moderate, major, or contraindicated                                     | 1.01  | (0.93, 1.10)   | 0.796   |
| Hypertension                | Hypertension flag                                                       | 1.05  | (0.96, 1.15)   | 0.318   |
| Hyperlipidemia              | Hyperlipidemia flag                                                     | 1.07  | (0.98, 1.16)   | 0.122   |
| Diabetes                    | Diabetes flag                                                           | 0.95  | (0.87, 1.04)   | 0.248   |
| Age                         | Age of a patient (2019)                                                 | 1.006 | (1.001, 1.010) | 0.010   |
| Income                      | Median household income per ZCTA level (standardized)                   | 1.04  | (1.00, 1.09)   | 0.058   |
| RAF Score                   | Risk adjustment factor score                                            | 1.01  | (0.98, 1.04)   | 0.603   |
| Gender <sup>c</sup>         | Gender of a patient                                                     | 1.10  | (1.01, 1.20)   | 0.028   |
| Race Code 1 <sup>d</sup>    | White (non-Hispanic)                                                    | 1.40  | (0.80, 2.45)   | 0.233   |
| Race Code 2 <sup>d</sup>    | Black (non-Hispanic)                                                    | 1.32  | (0.76, 2.32)   | 0.325   |
| Race Code 3 <sup>d</sup>    | Other                                                                   | 1.37  | (0.71, 2.61)   | 0.346   |
| Race Code 4 <sup>d</sup>    | Asian/Pacific Islander                                                  | 1.14  | (0.58, 2.21)   | 0.705   |
| Race Code 5 <sup>d</sup>    | Hispanic/Latino                                                         | 1.14  | (0.61, 2.13)   | 0.689   |
| I-SNP                       | Enrolled for at least one month in the institutional special needs plan | 0.71  | (0.64, 0.77)   | <0.001  |
| HCC009                      | Lung and other severe cancers                                           | 0.70  | (0.55, 0.89)   | 0.003   |

|        |                                                                             |      |              |       |
|--------|-----------------------------------------------------------------------------|------|--------------|-------|
| HCC027 | End-stage liver disease                                                     | 1.68 | (1.12, 2.51) | 0.011 |
| HCC028 | Cirrhosis of liver                                                          | 0.73 | (0.50, 1.05) | 0.086 |
| HCC039 | Bone/joint/muscle infections/necrosis                                       | 1.11 | (0.89, 1.37) | 0.352 |
| HCC046 | Severe hematological disorders                                              | 0.75 | (0.49, 1.15) | 0.183 |
| HCC047 | Disorders of immunity                                                       | 0.76 | (0.58, 0.99) | 0.038 |
| HCC048 | Coagulation defects and other specified hematological disorders             | 1.11 | (0.97, 1.28) | 0.134 |
| HCC054 | Substance use with psychotic complications                                  | 1.75 | (1.07, 2.86) | 0.026 |
| HCC055 | Substance use disorder, moderate/severe or substance use with complications | 1.15 | (0.96, 1.38) | 0.131 |
| HCC057 | Schizophrenia                                                               | 1.27 | (1.07, 1.52) | 0.007 |
| HCC077 | Multiple sclerosis                                                          | 1.35 | (1.00, 1.84) | 0.053 |
| HCC084 | Cardio-respiratory failure and shock                                        | 1.07 | (0.96, 1.20) | 0.227 |
| HCC104 | Monoplegia, other paralytic syndromes                                       | 0.34 | (0.16, 0.70) | 0.003 |
| HCC112 | Fibrosis of lung and other chronic lung disorders                           | 0.60 | (0.40, 0.91) | 0.017 |
| HCC114 | Aspiration and specified bacterial pneumonias                               | 1.02 | (0.86, 1.21) | 0.834 |
| HCC135 | Acute renal failure                                                         | 1.03 | (0.92, 1.16) | 0.566 |
| HCC158 | Pressure ulcer of skin with full thickness skin loss                        | 1.12 | (0.92, 1.35) | 0.262 |
| HCC167 | Major head injury                                                           | 1.55 | (1.10, 2.19) | 0.013 |
| HCC170 | Hip fracture/dislocation                                                    | 1.12 | (0.91, 1.37) | 0.280 |

<sup>a</sup>0-25% as baseline; <sup>b</sup>minimal or minor as baseline; <sup>c</sup>female as baseline; <sup>d</sup>unknown race as baseline  
Significance was set at p<0.05. PIP: pharmacogenomic interaction probability; DDI: drug-drug interaction; COPD: chronic obstructive pulmonary disease; RAF: risk adjustment factor; I-SNP: institutional special needs plan.

**eTable 13. Expected length-of-stay ratios in the model for patients with diabetes**

| <b>Variable</b>             | <b>Description</b>                                                      | <b>Ratio</b> | <b>95% C.I.</b> | <b>P-value</b> |
|-----------------------------|-------------------------------------------------------------------------|--------------|-----------------|----------------|
| (Intercept)                 | Intercept                                                               | 8.45         | (6.60, 10.80)   | <0.001         |
| Moderate PIP <sup>a</sup>   | 26% to 50%                                                              | 1.05         | (0.99, 1.12)    | 0.119          |
| High PIP <sup>a</sup>       | >50%                                                                    | 1.15         | (1.05, 1.25)    | 0.002          |
| DDI Category 1 <sup>b</sup> | Moderate, major, or contraindicated                                     | 1.07         | (1.01, 1.13)    | 0.031          |
| Hypertension                | Hypertension flag                                                       | 0.98         | (0.91, 1.04)    | 0.440          |
| Hyperlipidemia              | Hyperlipidemia flag                                                     | 0.98         | (0.92, 1.04)    | 0.544          |
| COPD                        | COPD flag                                                               | 0.98         | (0.92, 1.06)    | 0.649          |
| Age                         | Age of a patient (2019)                                                 | 1.004        | (1.001, 1.007)  | 0.008          |
| Income                      | Median household income per ZCTA level (standardized)                   | 1.08         | (1.05, 1.11)    | <0.001         |
| RAF Score                   | Risk adjustment factor score                                            | 1.03         | (1.00, 1.05)    | 0.033          |
| Gender <sup>c</sup>         | Gender of a patient                                                     | 1.08         | (1.01, 1.14)    | 0.016          |
| D-SNP                       | Enrolled for at least one month in the dual-eligible special needs plan | 0.91         | (0.81, 1.03)    | 0.144          |
| I-SNP                       | Enrolled for at least one month in the institutional special needs plan | 0.72         | (0.67, 0.77)    | <0.001         |
| HCC009                      | Lung and other severe cancers                                           | 0.70         | (0.55, 0.88)    | 0.003          |
| HCC010                      | Lymphoma and other cancers                                              | 1.25         | (0.99, 1.57)    | 0.056          |
| HCC017                      | Diabetes with acute complications                                       | 0.85         | (0.72, 1.02)    | 0.075          |
| HCC023                      | Other significant endocrine and metabolic disorders                     | 0.94         | (0.84, 1.05)    | 0.266          |
| HCC027                      | End-stage liver disease                                                 | 1.32         | (0.94, 1.83)    | 0.106          |

|        |                                                                             |      |              |       |
|--------|-----------------------------------------------------------------------------|------|--------------|-------|
| HCC033 | Intestinal obstruction/perforation                                          | 1.07 | (0.91, 1.26) | 0.436 |
| HCC035 | Inflammatory bowel disease                                                  | 1.20 | (0.91, 1.58) | 0.191 |
| HCC039 | Bone/joint/muscle infections/necrosis                                       | 1.10 | (0.94, 1.29) | 0.217 |
| HCC046 | Severe hematological disorders                                              | 0.75 | (0.55, 1.03) | 0.071 |
| HCC048 | Coagulation defects and other specified hematological disorders             | 1.07 | (0.96, 1.20) | 0.214 |
| HCC055 | Substance use disorder, moderate/severe or substance use with complications | 1.18 | (0.99, 1.42) | 0.072 |
| HCC072 | Spinal cord disorders/injuries                                              | 1.25 | (0.93, 1.68) | 0.141 |
| HCC077 | Multiple sclerosis                                                          | 1.33 | (1.04, 1.69) | 0.022 |
| HCC082 | Respirator dependence/ tracheostomy status                                  | 1.32 | (0.97, 1.79) | 0.078 |
| HCC099 | Cerebral hemorrhage                                                         | 1.24 | (0.98, 1.57) | 0.073 |
| HCC103 | Hemiplegia/hemiparesis                                                      | 1.07 | (0.96, 1.19) | 0.211 |
| HCC107 | Vascular disease with complications                                         | 1.10 | (0.95, 1.26) | 0.208 |
| HCC134 | Dialysis status                                                             | 0.87 | (0.75, 1.02) | 0.081 |
| HCC135 | Acute renal failure                                                         | 1.02 | (0.93, 1.11) | 0.733 |
| HCC161 | Chronic ulcer of skin, except pressure                                      | 1.11 | (0.99, 1.24) | 0.077 |

<sup>a</sup>0-25% PIP as baseline; <sup>b</sup>minimal or minor DDI as baseline; <sup>c</sup>female as baseline.

Significance was set at  $P < 0.05$ . PIP: pharmacogenomic interaction probability; DDI: drug-drug interaction; COPD: chronic obstructive pulmonary disease; RAF: risk adjustment factor; I-SNP: institutional special needs plan.

**eTable 14. Expected length-of-stay ratios in the model for patients with hyperlipidemia**

| Variable                    | Description                                                                 | Ratio | 95% C.I.       | P-value |
|-----------------------------|-----------------------------------------------------------------------------|-------|----------------|---------|
| (Intercept)                 | Intercept                                                                   | 6.46  | (5.06, 8.24)   | <0.001  |
| Moderate PIP <sup>a</sup>   | 26% to 50%                                                                  | 1.08  | (1.02, 1.15)   | 0.013   |
| High PIP <sup>a</sup>       | >50%                                                                        | 1.12  | (1.02, 1.22)   | 0.014   |
| DDI Category 1 <sup>b</sup> | Moderate, major, or contraindicated                                         | 1.05  | (0.99, 1.11)   | 0.096   |
| Hypertension                | Hypertension flag                                                           | 1.02  | (0.96, 1.08)   | 0.585   |
| Diabetes                    | Diabetes flag                                                               | 1.00  | (0.94, 1.06)   | 0.974   |
| COPD                        | COPD flag                                                                   | 1.05  | (0.98, 1.12)   | 0.209   |
| Age                         | Age of a patient (2019)                                                     | 1.007 | (1.004, 1.010) | <0.001  |
| Income                      | Median household income per ZCTA level (standardized)                       | 1.07  | (1.04, 1.10)   | <0.001  |
| RAF Score                   | Risk adjustment factor score                                                | 1.03  | (1.00, 1.05)   | 0.027   |
| Gender <sup>c</sup>         | Gender of a patient                                                         | 1.06  | (1.00, 1.12)   | 0.068   |
| I-SNP                       | Enrolled for at least one month in the institutional special needs plan     | 0.75  | (0.71, 0.80)   | <0.001  |
| HCC009                      | Lung and other severe cancers                                               | 0.74  | (0.58, 0.94)   | 0.015   |
| HCC023                      | Other significant endocrine and metabolic disorders                         | 0.87  | (0.77, 0.97)   | 0.017   |
| HCC028                      | Cirrhosis of liver                                                          | 0.72  | (0.51, 1.01)   | 0.059   |
| HCC046                      | Severe hematological disorders                                              | 0.62  | (0.45, 0.86)   | 0.004   |
| HCC055                      | Substance use disorder, moderate/severe or substance use with complications | 1.18  | (1.01, 1.39)   | 0.038   |
| HCC058                      | Reactive and unspecified psychosis                                          | 1.07  | (0.98, 1.15)   | 0.123   |

|        |                                                   |      |              |       |
|--------|---------------------------------------------------|------|--------------|-------|
| HCC072 | Spinal cord disorders/injuries                    | 1.15 | (0.88, 1.51) | 0.307 |
| HCC077 | Multiple sclerosis                                | 1.33 | (1.04, 1.69) | 0.022 |
| HCC082 | Respirator dependence/ tracheostomy status        | 1.51 | (1.11, 2.07) | 0.009 |
| HCC084 | Cardio-respiratory failure and shock              | 1.07 | (0.97, 1.19) | 0.184 |
| HCC099 | Cerebral hemorrhage                               | 1.15 | (0.89, 1.48) | 0.284 |
| HCC104 | Monoplegia, other paralytic syndromes             | 0.58 | (0.36, 0.94) | 0.027 |
| HCC112 | Fibrosis of lung and other chronic lung disorders | 0.78 | (0.56, 1.07) | 0.125 |
| HCC167 | Major head injury                                 | 1.06 | (0.84, 1.35) | 0.618 |
| HCC170 | Hip fracture/dislocation                          | 1.22 | (1.03, 1.45) | 0.022 |

<sup>a</sup>0-25% PIP as baseline; <sup>b</sup>minimal or minor DDI as baseline; <sup>c</sup>female as baseline.

Significance was set at  $P < 0.05$ . PIP: pharmacogenomic interaction probability; DDI: drug-drug interaction; COPD: chronic obstructive pulmonary disease; RAF: risk adjustment factor; I-SNP: institutional special needs plan.

**eTable 15. Expected length-of-stay ratios in the model for patients with hypertension**

| Variable                    | Description                                                             | Ratio | 95% C.I.       | P-value |
|-----------------------------|-------------------------------------------------------------------------|-------|----------------|---------|
| (Intercept)                 | Intercept                                                               | 12.45 | (11.24, 13.79) | <0.001  |
| Moderate PIP <sup>a</sup>   | 26% to 50%                                                              | 1.03  | (0.95, 1.12)   | 0.478   |
| High PIP <sup>a</sup>       | >50%                                                                    | 1.22  | (1.10, 1.35)   | <0.001  |
| DDI Category 1 <sup>b</sup> | Moderate, major, or contraindicated                                     | 1.02  | (0.95, 1.10)   | 0.522   |
| Hyperlipidemia              | Hyperlipidemia flag                                                     | 1.02  | (0.95, 1.10)   | 0.617   |
| Diabetes                    | Diabetes flag                                                           | 0.93  | (0.86, 1.00)   | 0.058   |
| COPD                        | COPD flag                                                               | 1.04  | (0.95, 1.13)   | 0.403   |
| Income                      | Median household income per ZCTA level (standardized)                   | 1.08  | (1.04, 1.11)   | <0.001  |
| RAF Score                   | Risk adjustment factor score                                            | 1.01  | (0.99, 1.04)   | 0.321   |
| I-SNP                       | Enrolled for at least one month in the institutional special needs plan | 0.73  | (0.68, 0.79)   | <0.001  |
| HCC039                      | Bone/joint/muscle infections/necrosis                                   | 1.17  | (0.98, 1.40)   | 0.091   |
| HCC084                      | Cardio-respiratory failure and shock                                    | 1.08  | (0.97, 1.21)   | 0.148   |
| HCC135                      | Acute renal failure                                                     | 1.07  | (0.97, 1.17)   | 0.175   |

<sup>a</sup>0-25% PIP as baseline; <sup>b</sup>minimal or minor DDI as baseline.

Significance was set at  $P < 0.05$ . PIP: pharmacogenomic interaction probability; DDI: drug-drug interaction; COPD: chronic obstructive pulmonary disease; RAF: risk adjustment factor; I-SNP: institutional special needs plan.
